# Supplementary material
Source: Springer Nature journal article supplement (https://www.springermedizin.de/resource/supplementary/12958_2009_556_MOESM3_ESM.pdf/9568300)

(i)

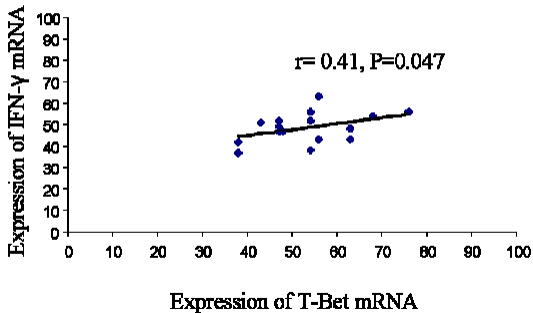

(ii)

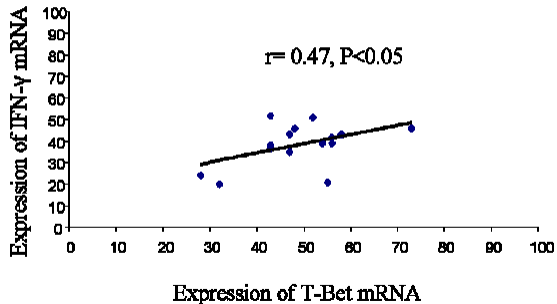

Supplement: MOESM3 [file 9568300]
